# Supplementary figures and images for: Submicron Topographically Patterned 3D Substrates Enhance Directional Axon Outgrowth of Dorsal Root Ganglia Cultured Ex Vivo
Source: MDPI journal article supplement (doi:10.3390/biom12081059), 2022-07-30

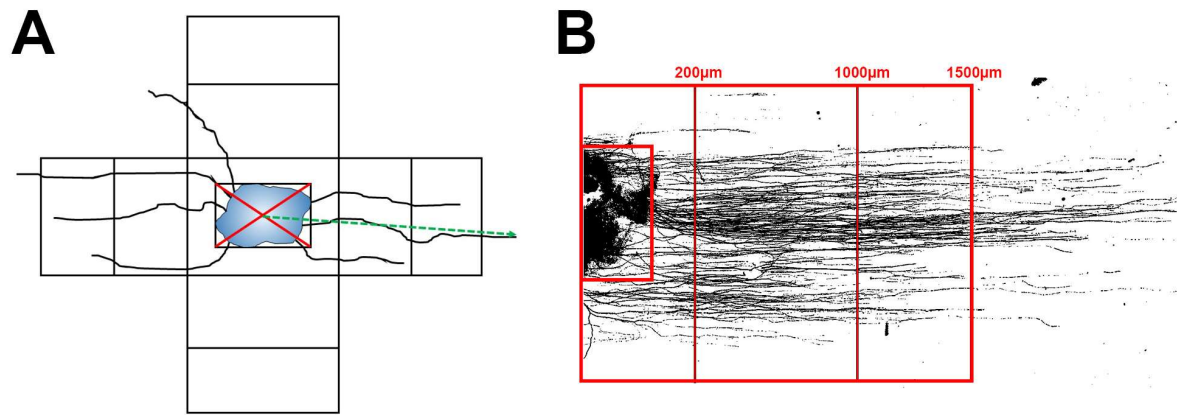

Figure S1: DRG axon measurement grids

Supplement: s1 [file s1]
